# Supplementary material for: Tim-3 protects decidual stromal cells from toll-like receptor-mediated apoptosis and inflammatory reactions and promotes Th2 bias at the maternal-fetal interface
Source: Sci Rep. 2015 Mar 11;5:9013. doi: 10.1038/srep09013 (PMC4355741; doi:10.1038/srep09013)
Supplement: Supplementary Information [file srep09013-s1.pdf]

Tim-3 protects decidual stromal cells from toll-like receptor-mediated apoptosis and inflammatory reactions and promotes Th2 bias at the maternal-fetal interface

Running title: The roles of Tim-3 signal in decidual stromal cell

SongCun Wang<sup>1, †</sup>, ChunMei Cao, <sup>2, †</sup>, HaiLan Piao<sup>1</sup>, YanHong Li<sup>1</sup>, Yu Tao<sup>1</sup>, XiaoMing Zhang<sup>3</sup>, Di Zhang<sup>1</sup>, Chan Sun<sup>1</sup>, Rui Zhu<sup>1</sup>, Yan Wang<sup>1</sup>, MinMin Yuan<sup>1</sup>, DaJin Li<sup>1</sup>, Mei-Rong Du<sup>1,\*</sup>

Figure S1. Poly(I:C) and pGN-SA induced apoptosis and proinflammatory cytokine production in DSCs.

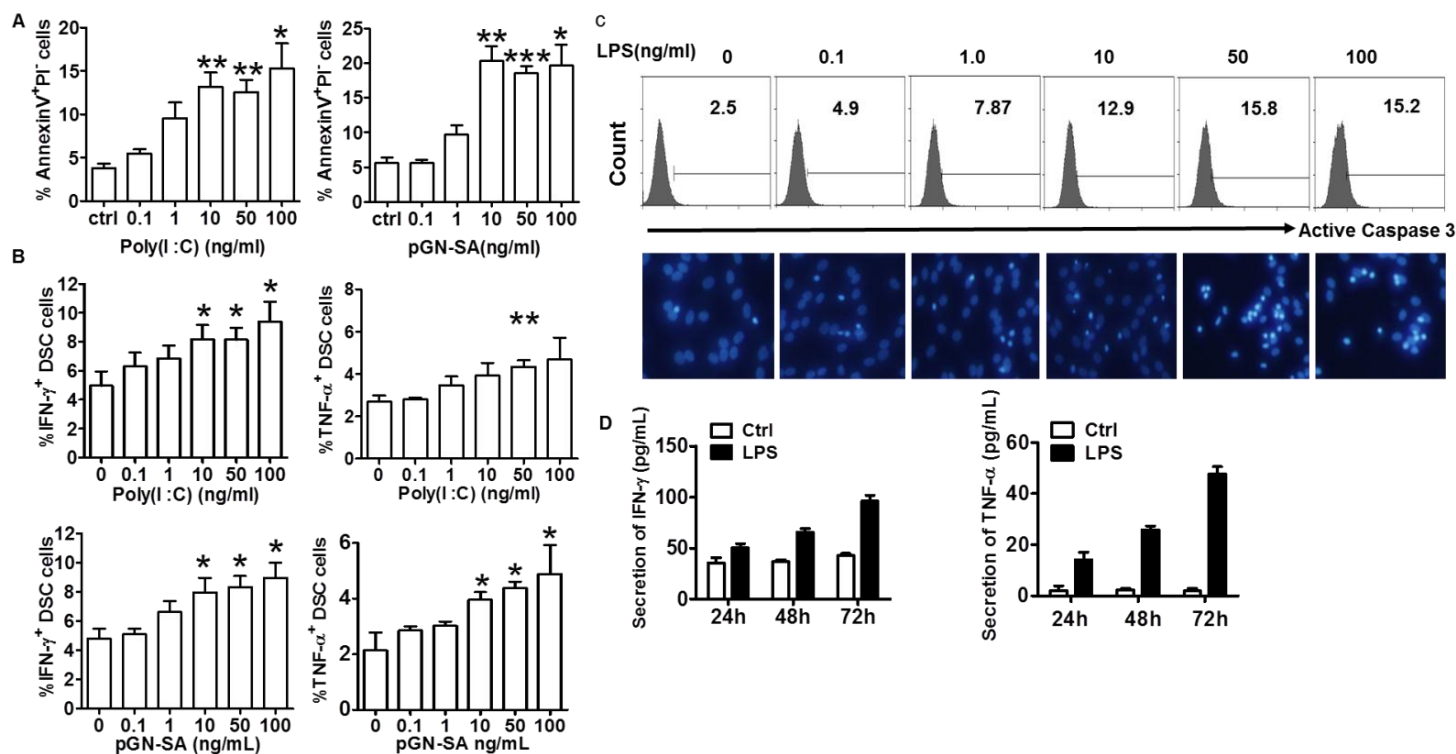

Quantitation of flow cytometric analysis of apoptosis based on annexin expression and PI staining (A) and IFN-γ and TNF-α production (B) in DSCs treated for 48 h with the indicated concentrations of poly(I:C) and pGN-SA. (C) Flow cytometric analysis of active caspase-3 (upper) and DAPI staining of DSC nuclear morphology after treatment of DSCs with the indicated concentrations of LPS. Flow cytometry plot shown is from one representative experiment; (D) The secretion of IFN-γ (left) and TNF-α (right) by DSCs in the treatment of LPS or control for different times. Data represent mean ± SEM of triplicates of one representative experiment of five separate experiments. Data represent mean ± SEM. n=14 DSCs in the first trimester of normal pregnancy. \*P≤0.05, \*\*P≤0.01, \*\*\*P≤0.001.

Figure S2. Tim-3 protected DSCs from Poly (I:C)- and pGN-SA-mediated apoptosis

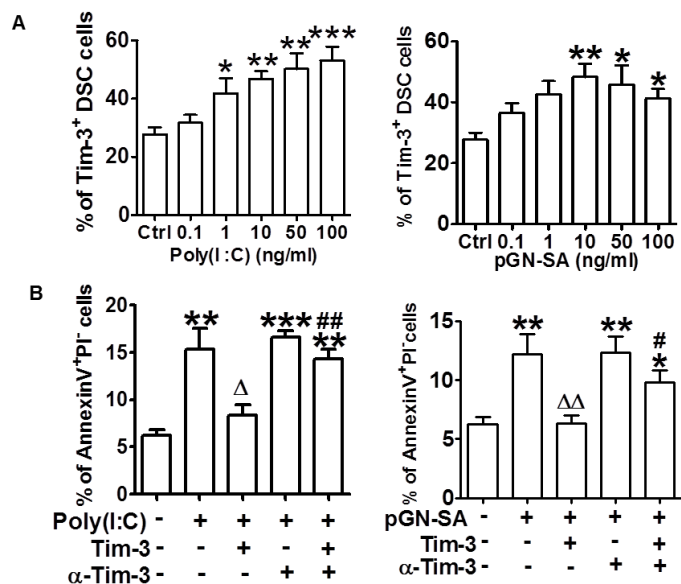

Quantitation of flow cytometric analysis of (A) Tim-3 expression in DSCs after treatment with the indicated concentrations of poly (I:C) and pGN-SA for 48 h, and of (B) apoptosis based on annexin expression and PI staining in DSCs treated with or without 10 mg/ml poly(I:C) (left) or pGN-SA (right) in the presence or absence of Tim-3 or anti - Tim-3 mAb. Data represent mean  $\pm$  SEM. \* $P \leq 0.05$ , \*\* $P \leq 0.01$ , \*\*\* $P \leq 0.001$ .

Figure S3. LPS activates NF- $\kappa$ B but not ERK1/2 in DSCs

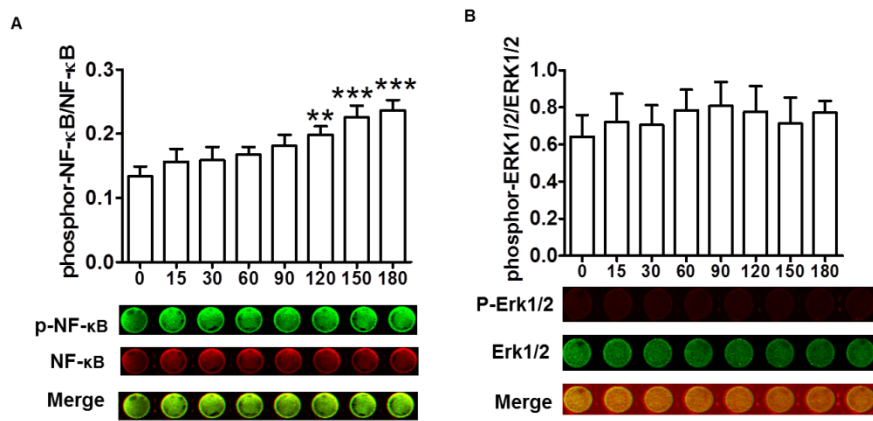

In-cell western analysis (lower) and quantitation (upper) of phosphorylation/activation of (A) NF- $\kappa$ B and (B) ERK1/2 in DSCs stimulated with or without LPS for different times. Images are representative of eight individual experiments. \*\* $P < 0.01$ , \*\*\* $P < 0.001$ , compared with group 0.
